# Supplementary material
Source: PubMed Central journal article supplement (PMC5967857)
Supplement: NIHMS917106-supplement-supp.pdf [file NIHMS917106-supplement-supp.pdf]

# Supplementary Web Materials for “A New Monte Carlo Method for Estimating Marginal Likelihoods”

Yu-Bo Wang <sup>\*</sup>, Ming-Hui Chen <sup>†</sup>, Lynn Kuo <sup>‡</sup>, and Paul O. Lewis <sup>§</sup>

---

<sup>\*</sup>Department of Statistics, University of Connecticut, Storrs, CT 06269, USA [yu-bo.wang@uconn.edu](mailto:yu-bo.wang@uconn.edu)

<sup>†</sup>Department of Statistics, University of Connecticut, Storrs, CT 06269, USA [ming-hui.chen@uconn.edu](mailto:ming-hui.chen@uconn.edu)

<sup>‡</sup>Department of Statistics, University of Connecticut, Storrs, CT 06269, USA [lynn.kuo@uconn.edu](mailto:lynn.kuo@uconn.edu)

<sup>§</sup>Department of Ecology and Evolutionary Biology, University of Connecticut, Storrs, CT 06269, USA [paul.lewis@uconn.edu](mailto:paul.lewis@uconn.edu)

## 1 Proof of Theorem 3.1.

Under certain ergodic conditions and Assumptions 1-2, we have

$$\begin{aligned}
& \lim_{T \rightarrow \infty} \frac{1}{T} \sum_{t=1}^T \sum_{k=1}^K \frac{w_k}{q(\boldsymbol{\theta}_t)} 1\{\boldsymbol{\theta}_t \in A_k\} \\
&= \sum_{k=1}^K w_k \lim_{T \rightarrow \infty} \frac{1}{T} \sum_{t=1}^T \frac{1}{q(\boldsymbol{\theta}_t)} 1\{\boldsymbol{\theta}_t \in A_k\} \\
&= \sum_{k=1}^K w_k \int_{\{\boldsymbol{\theta} \in A_k\}} \frac{1}{q(\boldsymbol{\theta})} \frac{q(\boldsymbol{\theta})}{c} d\boldsymbol{\theta} \\
&= \frac{1}{c} \sum_{k=1}^K w_k V(A_k),
\end{aligned}$$

which implies that  $\hat{d} \xrightarrow{a.s.} d = 1/c$ . Let  $q_{k,min} = \min_{\{\boldsymbol{\theta}_t \in A_k\}} q(\boldsymbol{\theta}_t)$ . Under Assumption 2, we have  $q_{k,min} > 0$ . Write  $g(\boldsymbol{\theta}_t) = \sum_{k=1}^K w_k/q(\boldsymbol{\theta}_t) 1\{\boldsymbol{\theta}_t \in A_k\}$ . Under Assumptions 1 and 2, we have

$$\begin{aligned}
\mathbb{E}[g(\boldsymbol{\theta}_t)]^2 &= \sum_{k=1}^K \mathbb{E}\left(\left[\frac{w_k}{q(\boldsymbol{\theta}_t)}\right] 1\{\boldsymbol{\theta}_t \in A_k\}\right)^2 \\
&\leq \sum_{k=1}^K \frac{w_k^2}{q_{k,min}} \mathbb{E}\left(\left[\frac{1}{q(\boldsymbol{\theta}_t)}\right] 1\{\boldsymbol{\theta}_t \in A_k\}\right) \\
&\leq \sum_{k=1}^K \frac{w_k^2 V(A_k)}{q_{k,min} c} < \infty,
\end{aligned} \tag{1}$$

which implies that  $\text{Var}[g(\boldsymbol{\theta}_i)] < \infty$ . Using Cauchy–Schwarz Inequality, we obtain

$$\begin{aligned}
\text{Var}\left[\frac{1}{T} \sum_{t=1}^T g(\boldsymbol{\theta}_t)\right] &= \frac{1}{T^2} \text{Var}\left[\sum_{t=1}^T g(\boldsymbol{\theta}_t)\right] \\
&= \frac{1}{T^2} \left\{ \sum_{t=1}^T \text{Var}[g(\boldsymbol{\theta}_t)] + 2 \sum_{t' < t''} \text{Cov}[g(\boldsymbol{\theta}_{t'}), g(\boldsymbol{\theta}_{t''})] \right\} \\
&\leq \frac{1}{T^2} \left\{ \sum_{t=1}^T \text{Var}[g(\boldsymbol{\theta}_t)] + 2 \sum_{t' < t''} \sqrt{\text{Var}[g(\boldsymbol{\theta}_{t'})] \text{Var}[g(\boldsymbol{\theta}_{t''})]} \right\}.
\end{aligned} \tag{2}$$

Thus,  $\text{Var}(\hat{d}) < \infty$  directly follows from (2).  $\square$

## 2 Proof of Theorem 3.2.

First,

$$\begin{aligned}
\text{Var}(\hat{d}_t) &= \text{Var}\left[\sum_{k=1}^K \frac{w_k^*}{q(\boldsymbol{\theta}_t)} 1\{\boldsymbol{\theta}_t \in A_k\}\right] \\
&= \text{E}\left[\sum_{k=1}^K \frac{w_k^*}{q(\boldsymbol{\theta})} 1\{\boldsymbol{\theta} \in A_k\}\right]^2 - \left(\text{E}\left[\sum_{k=1}^K \frac{w_k^*}{q(\boldsymbol{\theta})} 1\{\boldsymbol{\theta} \in A_k\}\right]\right)^2 \\
&= \text{E}\left[\sum_{k=1}^K \frac{w_k^{*2}}{q^2(\boldsymbol{\theta})} 1\{\boldsymbol{\theta} \in A_k\}\right] - \left(\sum_{k=1}^K w_k^* \text{E}\left[\frac{1}{q(\boldsymbol{\theta})} 1\{\boldsymbol{\theta} \in A_k\}\right]\right)^2 \\
&= \sum_{k=1}^K w_k^{*2} \text{E}\left[\frac{1}{q^2(\boldsymbol{\theta})} 1\{\boldsymbol{\theta} \in A_k\}\right] - \left[\sum_{k=1}^K \frac{w_k^* V(A_k)}{c}\right]^2 \\
&= \sum_{k=1}^K w_k^{*2} \alpha_k - \frac{1}{c^2}.
\end{aligned}$$

Secondly, with the constraint  $\sum_{k=1}^K w_k^* V(A_k) = 1$ , the optimal weights directly follow from the Lagrange multiplier method,

$$\begin{aligned}
&\frac{\partial}{\partial w_k^*} \left[ \left( \sum_{k=1}^K w_k^{*2} \alpha_k - \frac{1}{c^2} \right) - \lambda \left( \sum_{k=1}^K w_k^* V(A_k) - 1 \right) \right] = 0 \\
&\Rightarrow 2w_k^* \alpha_k - \lambda V(A_k) = 0 \\
&\Rightarrow w_k^* = \frac{\lambda V(A_k)}{2\alpha_k}, \quad \text{for } k = 1, \dots, K.
\end{aligned}$$

Replacing  $w_k^*$  by  $\lambda V(A_k)/(2\alpha_k)$  in the constraint, we can obtain  $\lambda = 1/\left[\sum_{k=1}^K V^2(A_k)/(2\alpha_k)\right]$  and  $w_{k,opt}^* = V(A_k)/\left[2\alpha_k \sum_{k=1}^K V^2(A_k)/(2\alpha_k)\right] = V(A_k)/\left[\alpha_k \sum_{k=1}^K V^2(A_k)/\alpha_k\right]$ , for  $k = 1, \dots, K$ . So,  $w_{k,opt}$  is proportional to  $V(A_k)/\alpha_k$  for  $k = 1, \dots, K$ . Under this setting, the variance can be simplified to

$$\text{Var}(\hat{d}_t) = \frac{1}{\sum_{k=1}^K V^2(A_k)/\alpha_k} - \frac{1}{c^2}. \quad (3)$$

### 3 Proof of Theorem 4.1.

Under certain ergodic conditions and Assumption 3, the consistency property can be proven similarly as that in the general PWK estimator in (10). Specifically, we have

$$\begin{aligned}
& \lim_{T \rightarrow \infty} \frac{1}{T} \sum_{t=1}^T \sum_{k=1}^{K^*} \frac{w_k(\boldsymbol{\theta}_t)}{q(\boldsymbol{\theta}_t)} 1\{\boldsymbol{\theta}_t \in A_k\} \\
&= \sum_{k=1}^{K^*} \lim_{T \rightarrow \infty} \frac{1}{T} \sum_{t=1}^T \frac{w_k(\boldsymbol{\theta}_t)}{q(\boldsymbol{\theta}_t)} 1\{\boldsymbol{\theta}_t \in A_k\} \\
&= \sum_{k=1}^{K^*} \int_{\{\boldsymbol{\theta} \in A_k\}} \frac{w_k(\boldsymbol{\theta})}{q(\boldsymbol{\theta})} \frac{q(\boldsymbol{\theta})}{c} d\boldsymbol{\theta} \\
&= \frac{1}{c} \sum_{k=1}^{K^*} \int_{\{\boldsymbol{\theta} \in A_k\}} w_k(\boldsymbol{\theta}) d\boldsymbol{\theta},
\end{aligned}$$

which implies that  $\hat{d}^* \xrightarrow{a.s.} d$ .
